# Supplementary material for: Multiple Regulatory Mechanisms Control the Production of CmrRST, an Atypical Signal Transduction System in Clostridioides difficile
Source: PubMed Central journal article supplement (PMC8844915; doi:10.1128/mbio.02969-21), 2022-02-15
Supplement: mbio.02969-21-sf002.pdf [file mbio.02969-21-sf002.pdf]

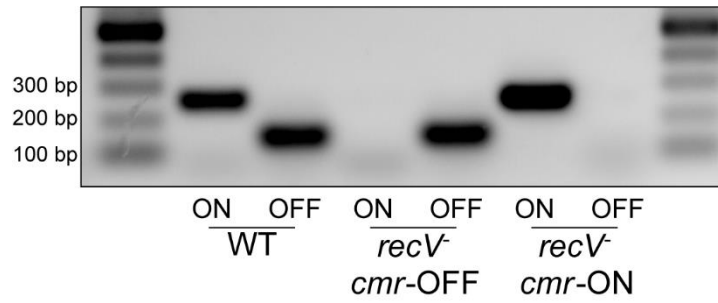

**Fig S2. The *cmr* switch is phase-locked in *recV*-deficient strains.** Orientation-specific PCR to detect the orientation of the *cmr* switch in WT, *recV* *cmr*-OFF, and *recV* *cmr*-ON.
