# Supplementary material for: Multiple Regulatory Mechanisms Control the Production of CmrRST, an Atypical Signal Transduction System in Clostridioides difficile
Source: PubMed Central journal article supplement (PMC8844915; doi:10.1128/mbio.02969-21), 2022-02-15
Supplement: mbio.02969-21-st001.pdf [file mbio.02969-21-st001.pdf]

**S1 Table. Strains and plasmids used in this study**

| Lab Notation | Strain Name                                                         | Description                                                                                                                                                                                            | Reference      |
|--------------|---------------------------------------------------------------------|--------------------------------------------------------------------------------------------------------------------------------------------------------------------------------------------------------|----------------|
| AC472        | <i>Escherichia coli</i> DH5 $\alpha$                                | F- $\phi$ 80 <i>lacZ</i> $\Delta$ M15 $\Delta$ ( <i>lacZYA-argF</i> )U169 <i>recA1 endA1 hsdR17</i> (rk <sup>-</sup> , mk <sup>+</sup> ) <i>phoA supE44 thi-1 gyrA96 relA1</i> $\lambda$ - <i>tonA</i> | Invitrogen (1) |
| RT270        | <i>Escherichia coli</i> HB101(pRK24)                                | <i>E. coli</i> used in conjugations with <i>C. difficile</i> , Ap <sup>R</sup> , Cm <sup>R</sup>                                                                                                       | (2)            |
| RT273        | <i>C. difficile</i> R20291                                          | Ribotype 027 strain, WT (Genbank Accession # FN545816)                                                                                                                                                 | (3)            |
| RT2395       | R20291 <i>cmr</i> - $\Delta$ 3 OFF                                  | R20291 with the <i>cmr</i> invertible element locked in the OFF orientation due to the deletion of three nucleotides in the right inverted repeat                                                      | This work      |
| RT2406       | R20291 <i>cmr</i> - $\Delta$ 3 ON                                   | R20291 with the <i>cmr</i> invertible element locked in the ON orientation due to the deletion of three nucleotides in the right inverted repeat                                                       | This work      |
| RT2256       | R20291 $\Delta$ <i>cmrR</i>                                         | R20291 with in-frame deletion of <i>cmrR</i>                                                                                                                                                           | (4)            |
| RT2296       | R20291 $\Delta$ <i>cmrR</i> $\Delta$ <i>cmrT</i>                    | R20291 with in-frame deletions of <i>cmrR</i> and <i>cmrT</i>                                                                                                                                          | This work      |
| RT2435       | R20291 <i>cmr</i> - $\Delta$ 3 ON vector                            | R20291 <i>cmr</i> -ON with pRT1611; vector control                                                                                                                                                     | This work      |
| RT2436       | R20291 <i>cmr</i> - $\Delta$ 3 ON pP <sub>tet</sub> :: <i>dccA</i>  | R20291 <i>cmr</i> -ON with pRT1587 for inducible <i>dccA</i> expression to increase c-di-GMP                                                                                                           | This work      |
| RT2437       | R20291 <i>cmr</i> - $\Delta$ 3 ON pP <sub>tet</sub> ::EAL           | R20291 <i>cmr</i> -ON with pRT2444 for inducible <i>pdca</i> EAL domain expression to decrease c-di-GMP                                                                                                | This work      |
| RT2438       | R20291 <i>cmr</i> - $\Delta$ 3 OFF vector                           | R20291 <i>cmr</i> -OFF with pRT1611; vector control                                                                                                                                                    | This work      |
| RT2439       | R20291 <i>cmr</i> - $\Delta$ 3 OFF pP <sub>tet</sub> :: <i>dccA</i> | R20291 <i>cmr</i> -OFF with pRT1587 for inducible <i>dccA</i> expression to increase c-di-GMP                                                                                                          | This work      |
| RT2440       | R20291 <i>cmr</i> - $\Delta$ 3 OFF pP <sub>tet</sub> ::EAL          | R20291 <i>cmr</i> locked OFF with pRT2444 for inducible <i>pdca</i> EAL domain expression to decrease c-di-GMP                                                                                         | This work      |
| RT2187       | R20291 <i>cmrR</i> ::SNAP                                           | R20291 with <i>cmrR</i> replaced by allelic exchange with a SNAP-tag coding sequence                                                                                                                   | (5)            |
| RT2500       | R20291 <i>cmrR</i> ::SNAP vector                                    | R20291 <i>cmrR</i> ::SNAP with pRT1611                                                                                                                                                                 | This work      |
| RT2501       | R20291 <i>cmrR</i> ::SNAP pP <sub>tet</sub> :: <i>dccA</i>          | R20291 <i>cmrR</i> ::SNAP with pRT1587 for inducible <i>dccA</i> expression to increase c-di-GMP                                                                                                       | This work      |
| RT1693       | R20291 <i>recV cmr</i> -OFF                                         | R20291 with an insertional mutation in <i>recV</i> ( <i>recV</i> :: <i>ermB</i> ); <i>cmr</i> locked OFF                                                                                               | (6)            |
| RT2502       | R20291 <i>recV cmr</i> -OFF pMC123:: <i>phoZ</i>                    | R20291 <i>recV</i> :: <i>ermB cmr</i> -OFF with pMC123:: <i>phoZ</i> (vector control)                                                                                                                  | This work      |
| RT2507       | R20291 <i>recV cmr</i> -OFF pMC123:: <i>TSS4-phoZ</i>               | R20291 <i>recV</i> :: <i>ermB cmr</i> -OFF with pRT2497 with reporter for TSS4 region only                                                                                                             | This work      |
| RT2516       | R20291 <i>recV cmr</i> -OFF pMC123:: <i>cmr</i> OFF- <i>phoZ</i>    | R20291 <i>recV</i> :: <i>ermB cmr</i> -OFF with pRT2514 with reporter for <i>cmr</i> -OFF sequence                                                                                                     | This work      |
| RT2517       | R20291 <i>recV cmr</i> -OFF pMC123:: <i>cmr</i> ON- <i>phoZ</i>     | R20291 <i>recV</i> :: <i>ermB cmr</i> -OFF with pRT2515 with reporter for <i>cmr</i> -ON sequence                                                                                                      | This work      |
| RT1615       | R20291 vector                                                       | R20291 with pRT1611 (vector control)                                                                                                                                                                   | (7)            |
| RT2085       | R20291 pCmrR                                                        | R20291 with pRT2073 (P <sub>tet</sub> :: <i>cmrR</i> )                                                                                                                                                 | (4)            |
| RT2107       | R20291 pCmrT                                                        | R20291 with pRT2106 (P <sub>tet</sub> :: <i>cmrT</i> )                                                                                                                                                 | (4)            |

|                     |                                                                                                       |                                                                                                                        |                  |
|---------------------|-------------------------------------------------------------------------------------------------------|------------------------------------------------------------------------------------------------------------------------|------------------|
| RT2463              | R20291 <i>cmr</i> -Δ3 OFF pCmrR                                                                       | R20291 <i>cmr</i> locked OFF with pRT2073 (P <sub>tet</sub> :: <i>cmrR</i> )                                           | This work        |
| RT2465              | R20291 <i>cmr</i> -Δ3 ON pCmrR                                                                        | R20291 <i>cmr</i> locked ON with pRT2106 (P <sub>tet</sub> :: <i>cmrT</i> )                                            | This work        |
| RT2269              | R20291 Δ <i>cmrT</i> vector                                                                           | R20291 Δ <i>cmrT</i> with pRT1611 (vector control)                                                                     | (4)              |
| RT2402              | R20291 Δ <i>cmrT</i> pCmrR                                                                            | R20291 Δ <i>cmrT</i> with pRT2073 (P <sub>tet</sub> :: <i>cmrR</i> )                                                   | This work        |
| RT2270              | R20291 Δ <i>cmrT</i> pCmrT                                                                            | R20291 Δ <i>cmrT</i> with pRT2106 (P <sub>tet</sub> :: <i>cmrT</i> )                                                   | (4)              |
| RT2183              | R20291 <i>recV cmr</i> -OFF pMC-P <sub>cpr</sub>                                                      | R20291 <i>recV::ermB cmr</i> -OFF with pMC-P <sub>cpr</sub>                                                            | This work        |
| RT2184              | R20291 <i>recV cmr</i> -OFF pDccA                                                                     | R20291 <i>recV::ermB cmr</i> -OFF with pMC-P <sub>cpr</sub> :: <i>dccA</i>                                             | This work        |
| RT1697              | R20291 <i>recV cmr</i> -OFF pRecV                                                                     | R20291 <i>recV::ermB cmr</i> -OFF with pP <sub>tet</sub> -RecV                                                         | (8)              |
| RT2520              | R20291 <i>recV cmr</i> -ON                                                                            | R20291 <i>recV::ermB cmr</i> locked ON, derived from RT1693                                                            | This work        |
| RT2198              | R20291 <i>recV cmr</i> -OFF vector                                                                    | R20291 <i>recV::ermB cmr</i> -OFF with pRT1611 (vector control)                                                        | This work        |
| RT2543              | R20291 <i>recV cmr</i> -OFF pCmrR                                                                     | R20291 <i>recV::ermB cmr</i> -OFF with pRT2073 (P <sub>tet</sub> :: <i>cmrR</i> )                                      | This work        |
| RT2544              | R20291 <i>recV cmr</i> -ON vector                                                                     | R20291 <i>recV::ermB cmr</i> -ON with pRT1611 (vector control)                                                         | This work        |
| RT2545              | R20291 <i>recV cmr</i> -ON pCmrR                                                                      | R20291 <i>recV::ermB cmr</i> -ON with pRT2073 (P <sub>tet</sub> :: <i>cmrR</i> )                                       | This work        |
| RT2826              | R20291 <i>recV</i> CDR2492::P <sub>tet</sub> :: <i>cmrR</i>                                           | R20291 <i>recV::erm</i> with ATc-inducible <i>cmrR</i> integrated between CDR20291_2492 and 2493                       | This work        |
| RT2827              | R20291 <i>recV</i> CDR2492::P <sub>tet</sub> :: <i>cmrR</i> vector                                    | Inducible <i>cmrR</i> strain with pRT1343 (pMC123:: <i>phoZ</i> )                                                      | This work        |
| RT2828              | R20291 <i>recV</i> CDR2492::P <sub>tet</sub> :: <i>cmrR</i> pMC123::TSS4- <i>phoZ</i>                 | Inducible <i>cmrR</i> strain with pRT2497                                                                              | This work        |
| RT2829              | R20291 <i>recV</i> CDR2492::P <sub>tet</sub> :: <i>cmrR</i> pMC123:: <i>cmr</i> OFF/TSS4- <i>phoZ</i> | Inducible <i>cmrR</i> strain with pRT2514                                                                              | This work        |
| RT2830              | R20291 <i>recV</i> CDR2492::P <sub>tet</sub> :: <i>cmrR</i> pMC123:: <i>cmr</i> ON/TSS4- <i>phoZ</i>  | Inducible <i>cmrR</i> strain with pRT2515                                                                              | This work        |
| RT2831              | R20291 <i>recV</i> CDR2492::P <sub>tet</sub> :: <i>cmrR</i> pMC123::5'UTR <i>cmr</i> OFF- <i>phoZ</i> | Inducible <i>cmrR</i> strain with pRT2565                                                                              | This work        |
| RT2832              | R20291 <i>recV</i> CDR2492::P <sub>tet</sub> :: <i>cmrR</i> pMC123::TSS1- <i>phoZ</i>                 | Inducible <i>cmrR</i> strain with pRT2566                                                                              | This work        |
| RT2833              | R20291 <i>recV</i> CDR2492::P <sub>tet</sub> :: <i>cmrR</i> pMC123:: <i>cmr</i> OFF- <i>phoZ</i>      | Inducible <i>cmrR</i> strain with pRT2567                                                                              | This work        |
| RT2834              | R20291 <i>recV</i> CDR2492::P <sub>tet</sub> :: <i>cmrR</i> pMC123:: <i>cmr</i> ON- <i>phoZ</i>       | Inducible <i>cmrR</i> strain with pRT2568                                                                              | This work        |
|                     |                                                                                                       |                                                                                                                        |                  |
| <b>Lab Notation</b> | <b>Plasmid Name</b>                                                                                   | <b>Description</b>                                                                                                     | <b>Reference</b> |
|                     | pMTL-SC7215                                                                                           | Vector for allelic exchange in <i>C. difficile</i> R20291                                                              | (9)              |
|                     | pRPF185                                                                                               | <i>E. coli</i> – <i>C. difficile</i> shuttle vector, contains ATc-inducible P <sub>tet</sub> promoter with <i>gusA</i> | (10)             |
|                     | pRT1611                                                                                               | Derivative of pRPF185 with <i>gusA</i> removed, vector control                                                         | (7)              |

|         |                                                         |                                                                                                                                       |           |
|---------|---------------------------------------------------------|---------------------------------------------------------------------------------------------------------------------------------------|-----------|
| pRT1587 | pP <sub>tet</sub> :: <i>dccA</i>                        | pRPF185 with <i>gusA</i> replaced by <i>dccA</i> , ATc-inducible expression                                                           | This work |
| pRT2444 | pP <sub>tet</sub> ::EAL                                 | pRPF185 with <i>gusA</i> replaced by EAL domain sequence from <i>pdca</i> , ATc-inducible expression                                  | This work |
| pRT2073 | pCmrR                                                   | pRPF185 with <i>gusA</i> replaced by <i>cmrR</i> , ATc-inducible expression                                                           | (4)       |
| pRT2106 | pCmrT                                                   | pRPF185 with <i>gusA</i> replaced by <i>cmrT</i> , ATc-inducible expression                                                           | (4)       |
|         | pMC123                                                  | <i>E. coli</i> – <i>C. difficile</i> shuttle vector                                                                                   | (2)       |
| pRT402  | pDccA                                                   | pMC-P <sub>opr</sub> :: <i>dccA</i> (nisin-inducible)                                                                                 | (11)      |
| pRT1343 | pMC123:: <i>phoZ</i>                                    | pMC123 with <i>Enterococcus faecalis phoZ</i>                                                                                         | (7)       |
| pRT2497 | pMC123::TSS4- <i>phoZ</i>                               | <i>phoZ</i> transcriptional reporter of the region between <i>cmrR</i> and right inverted repeat of the <i>cmr</i> invertible element | This work |
| pRT2514 | pMC123:: <i>cmr</i> OFF/TSS4- <i>phoZ</i>               | <i>phoZ</i> transcriptional reporter of the region from the <i>cmr</i> invertible element (OFF) to <i>cmrR</i>                        | This work |
| pRT2515 | pMC123:: <i>cmr</i> ON/TSS4- <i>phoZ</i>                | <i>phoZ</i> transcriptional reporter of the region from the <i>cmr</i> invertible element (ON) to <i>cmrR</i>                         | This work |
| pRT2566 | pMC123::TSS1- <i>phoZ</i>                               | <i>phoZ</i> transcriptional reporter of the region from the TSS1 promoter/c-di-GMP riboswitch to the LIR of the <i>cmr</i> switch     | This work |
| pRT2567 | pMC123:: <i>cmr</i> OFF- <i>phoZ</i>                    | <i>phoZ</i> transcriptional reporter of the region from the <i>cmr</i> invertible element (OFF) excluding TSS4 region                 | This work |
| pRT2568 | pMC123:: <i>cmr</i> ON- <i>phoZ</i>                     | <i>phoZ</i> transcriptional reporter of the region from the <i>cmr</i> invertible element (ON) excluding TSS4 region                  | This work |
| pRT2565 | pMC123::5'UTR <i>cmr</i> OFF- <i>phoZ</i>               | <i>phoZ</i> transcriptional reporter of the full <i>cmrRST</i> regulatory region with <i>cmr</i> switch OFF                           | This work |
|         | pMSR0                                                   | Vector for allelic exchange in <i>C. difficile</i> R20291, uses toxin-antitoxin counterselection                                      | (12)      |
| pRT2825 | pMSR0::CDR2492-P <sub>tet</sub> :: <i>cmrR</i> -CDR2493 | Allelic exchange vector for inserting P <sub>tet</sub> :: <i>cmrR</i> between CDR20291_2492 and CDR20291_2493                         | This work |

## References

1. Hanahan, D. (1983) Studies on transformation of *Escherichia coli* with plasmids. *J Mol Biol* **166**, 557-580
2. McBride, S. M., and Sonenshein, A. L. (2011) Identification of a genetic locus responsible for antimicrobial peptide resistance in *Clostridium difficile*. *Infection and immunity* **79**, 167-176
3. Stabler, R. A., He, M., Dawson, L., Martin, M., Valiente, E., Corton, C., Lawley, T. D., Sebahia, M., Quail, M. A., Rose, G., Gerding, D. N., Gibert, M., Popoff, M. R., Parkhill, J., Dougan, G., and Wren, B. W. (2009) Comparative genome and phenotypic analysis of *Clostridium difficile* 027 strains provides insight into the evolution of a hypervirulent bacterium. *Genome biology* **10**, R102
4. Garrett, E. M., Sekulovic, O., Wetzel, D., Jones, J. B., Edwards, A. N., Vargas-Cuebas, G., McBride, S. M., and Tamayo, R. (2019) Phase variation of a signal transduction system controls *Clostridioides difficile* colony morphology, motility, and virulence. *Plos Biology* **17**. e3000379  
10.137/journal.pbio.30003791
5. Sekulovic, O., Mathias Garrett, E., Bourgeois, J., Tamayo, R., Shen, A., and Camilli, A. (2018) Genome-wide detection of conservative site-specific recombination in bacteria. *PLoS Genet* **14**, e1007332
6. Sekulovic, O., Ospina Bedoya, M., Fivian-Hughes, A. S., Fairweather, N. F., and Fortier, L. C. (2015) The *Clostridium difficile* cell wall protein CwpV confers phase-variable phage resistance. *Molecular microbiology* **98**, 329-342
7. Anjuwon-Foster, B. R., and Tamayo, R. (2017) A genetic switch controls the production of flagella and toxins in *Clostridium difficile*. *PLoS Genet* **13**, e1006701
8. Anjuwon-Foster, B. R., and Tamayo, R. (2018) Phase variation of *Clostridium difficile* virulence factors. *Gut Microbes* **9**, 76-83
9. Cartman, S. T., Kelly, M. L., Heeg, D., Heap, J. T., and Minton, N. P. (2012) Precise manipulation of the *Clostridium difficile* chromosome reveals a lack of association between the *tcdC* genotype and toxin production. *Applied and Environmental Microbiology* **78**, 4683-4690
10. Fagan, R. P., and Fairweather, N. F. (2011) *Clostridium difficile* has two parallel and essential Sec secretion systems. *The Journal of biological chemistry* **286**, 27483-27493
11. Purcell, E. B., McKee, R. W., McBride, S. M., Waters, C. M., and Tamayo, R. (2012) Cyclic diguanylate inversely regulates motility and aggregation in *Clostridium difficile*. *Journal of Bacteriology* **194**, 3307-3316
12. Peltier, J., Hamiot, A., Garneau, J. R., Boudry, P., Maikova, A., Hajnsdorf, E., Fortier, L. C., Dupuy, B., and Soutourina, O. (2020) Type I toxin-antitoxin systems contribute to the maintenance of mobile genetic elements in *Clostridioides difficile*. *Commun Biol* **3**. 10.1038/s42003-020-01448-
