# Supplementary material for: Multiple Regulatory Mechanisms Control the Production of CmrRST, an Atypical Signal Transduction System in Clostridioides difficile
Source: PubMed Central journal article supplement (PMC8844915; doi:10.1128/mbio.02969-21), 2022-02-15
Supplement: mbio.02969-21-st002.pdf [file mbio.02969-21-st002.pdf]

[Type here]

[Type here]

Garrett, Mehra, Sekulovic, and Tamayo

**S2 Table. Primers used in this study.**

| <b>Primer Name</b> | <b>Primer Sequence (5' to 3')</b>                              |
|--------------------|----------------------------------------------------------------|
| OS383              | GTTTTTGTACCCTAAGTTTAGTAATAGTATCAAGAGAAGAAGG                    |
| OS384              | AGTCTCCGTTGGAGAATGGAGCTTAAAG                                   |
| OS385              | TCTCCAACCGGAGACTTTAATTAGTATTTAATAATAAATC                       |
| OS386              | GATTATCAAAAAGGAGTTTCCATTACTTGCTCTAATAGAC                       |
| OS268              | TTTTTTGTACCCTAAGTTTGCCATCCATGTATCCTATC                         |
| OS269              | TTAATATATTTATATAATCACTCCCAAATATCATTATTC                        |
| OS271              | AGATTATCAAAAAGGAGTTTTGTCAAATCTTGTAACCAAC                       |
| OS283              | AGTGATTATAGAAAATTATAACAATAAGAGGAGC                             |
| OS387              | GACTTTAAGCTCCATTCTCCAACAAT                                     |
| OS137              | GAACAATTCTTGAATATTGTATTGAACATTAAGA                             |
| OS109              | GGAGATATATGGAGTTAGTGGTGCAA                                     |
| OS111              | CGCTCTACTATATCCATAGCATCTTT                                     |
| OS388              | AGTCTCCGTTGGAAAAGGGAAATTTTTTAAAAAG                             |
| OS389              | TTTCCAACCGGAGACTTTAATTAGTATTTAATAATAAATC                       |
| OS390              | CTTTTTAAAAATTTCCCTTTTCCAACAAT                                  |
| OS391              | CACCACTCCATTCAAAGGTATTTAATC                                    |
| R1907              | <u>CAGAGCTC</u> CTAGTACAAAGTATTTTATTTTGGAG                     |
| R1908              | <u>GACGGATCC</u> CAGTACTTAATGTCAATATCTTGTATAG                  |
| R2689              | <u>CAGAGCTC</u> CTATGGAGGAGATAAGTATATGGATTAAAGGCATCAATTAATGATG |
| R2690              | <u>CAGGATCC</u> ATACTATTCCCAATTTAACATCC                        |
| R2754              | ATGC <u>GAAATTC</u> ACTTTAATTAGTATTTAATAATAAATCTTAATG          |
| R2342              | ATGC <u>AGGATCC</u> CATTACCACTCCATTCAAAGG                      |
| R2337              | ATGC <u>GAAATTC</u> GGTGAAATTTTGGCTTTTAAAGTAGCC                |
| R2270              | GGAGATATATGGAGTTAGTGGTGCAA                                     |
| R2271              | CTAGCCAATAGACAAGTTTCTAGAAAAATA                                 |
| R2272              | GAACAATTCTTGAATATTGTATTGAACATTAAGA                             |
| R850               | CTAGCTGCTCCTATGTCTCACATC                                       |
| R851               | CCAGTCTCTCCTGGATCAACTA                                         |
| R2918              | CTCCTGAAATACTTGATGAACCAGAAGCTTAAGACCCACTTTTACATTTAAGTTG        |
| R2919              | GGTATATGATATGAAAGAGAGAGTCTCAAACAGTATCTCACTTATGGTACAACTTATATCC  |
| R2914              | CATTGATTTCTTTCAGTTTCGGATCCCTCCTGAAATACTTGATGAACCAGAAG          |
| R2915              | CAACTTAAATGTGAAAGTGGGTCTTAAGGTGAACTTTTGTTTCATGAGACACTC         |
| R2916              | GGATATAAGTTTGTACCATAAGTGAGATACTGTTTGAGACTCTCTTTTCATATCATATACC  |
| R2917              | GACGTCGACTCTAGAGGATCCTACATGCAATAACAGTACCTCAGGA                 |
| R2743              | GTGTTATCAATTGCACTACTCATGG                                      |
| R2744              | GTTGAACCATTAGCTAAGGATTCAG                                      |
| R2987              | GTATGTTAGAAGTTGTTTCAGAAGGC                                     |
| R2988              | GTGGCTGAAGTAGTATCAGAAGC                                        |
| R2298              | AAGAAAAAGTTCGGGGATTTTTAGC                                      |
| R2299              | CGCTGAAAATTTAACACATTAGGA                                       |
| R2537              | GACAAGGATAATTGCC                                               |
| R2538              | CCATCACCATCAGTTAG                                              |

[Type here]

[Type here]

Garrett, Mehra, Sekulovic, and Tamayo

|       |                                          |
|-------|------------------------------------------|
| R2539 | GATAGATGACTGGGAG                         |
| R2540 | CGATAAGTAGCATTCCC                        |
| R2745 | CTTTTTTTGCTTTAAAATTAACAAAAATGTTGC        |
| R2746 | CTTTAAAAGCCAAAATTTACCTATCAATA            |
| R2751 | CTTAATGTTCAATACAATATTCAAGAATTG           |
| R2803 | GAAAATAAACATTATAATTTGTAATAATTATAAACTTGAG |
| R2804 | CCAGTAAATTATACATTACACCACTCC              |
| R2716 | GTCTCTGATGTATATACATTAACC                 |
| R2273 | TCATTACCAGGTGTAGCAGTGAATGC               |
| R2274 | GATAGAGCATGGTCCTTGAGCTTCT                |
| R2792 | GTCTAAAACATACGCTC                        |
| R2793 | CCATAGCATCTTTAGCAGTCTCTGATGTATATA        |
| R3171 | ACCATATAAATCATATAAATC                    |
| R3172 | ACTCAAACACTAGCCAATAGACAAGTTTCTAG         |

Restriction sites are underlined. Regions of homology for Gibson assembly are lowercase.
